# Supplementary material for: Modulating the mixed micellization of CTAB and an ionic liquid 1-hexadecyl-3-methylimidazollium bromide via varying physical states of ionic liquid
Source: Royal Society of Chemistry journal article supplement (doi:10.1039/c6ra05330k), 2016-01-01
Supplement: c6ra05330k1.pdf [file c6ra05330k1.pdf]

# **Modulating the Mixed Micellization of CTAB and an Ionic Liquid 1-Hexadecyl-3-methylimidazolium Bromide via Varying Physical States of Ionic Liquid**

Chanda Chadha,<sup>a</sup> Gurbir Singh,<sup>b</sup> Gurpreet Singh,<sup>b</sup> Harsh Kumar,<sup>a,\*</sup> Tejwant Singh Kang<sup>b,\*</sup>

<sup>a</sup>*Department of Chemistry, Dr. B. R. Ambedkar National Institute of Technology, Jalandhar, 144011, India*

<sup>b</sup>*Department of Chemistry, UGC-centre for Advance Studies – II, Guru Nanak Dev University, Amritsar, 143005, India.*

**Supporting Information**

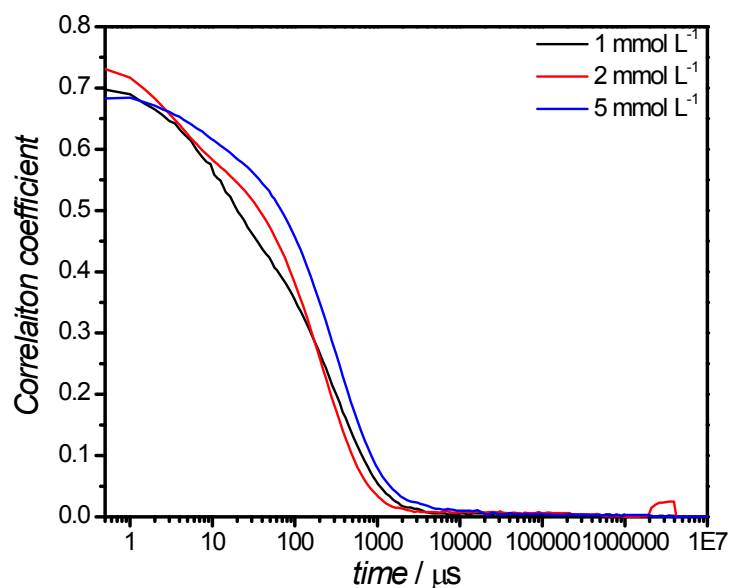

Figure S1. Correlogram obtained from DLS measurements for aqueous solutions of [C16mim][Br] in the absence of CTAB at different concentrations.

**Table S1.** A comparison of  $^1\text{H}$  Spin-lattice relaxation Time ( $T_1$ ) for different protons of IL ( $H_k$  and  $H_i$ ) and CTAB ( $H_e$ ) along with alkyl chain protons at different concentrations of IL, CTAB and IL-CTAB mixed systems below and above cmc at 298.15 K as per Figure 6.

| Protons | $^1\text{H}$ Spin-lattice relaxation Time ( $T_1$ ) |                     |                           |                                |                             |                             |                           |                                |
|---------|-----------------------------------------------------|---------------------|---------------------------|--------------------------------|-----------------------------|-----------------------------|---------------------------|--------------------------------|
|         | CTAB                                                |                     | IL<br>(1 mmol L $^{-1}$ ) | IL-CTAB<br>(1 mmol L $^{-1}$ ) | IL /<br>(2 mmol L $^{-1}$ ) | IL-CTAB<br>2 mmol L $^{-1}$ | IL<br>(5 mmol L $^{-1}$ ) | IL-CTAB<br>(5 mmol L $^{-1}$ ) |
|         | Below<br><i>cmc</i>                                 | Above<br><i>cmc</i> |                           |                                |                             |                             |                           |                                |
| $H_k$   |                                                     |                     | 2.23 $\pm$ 0.35           | 2.09 $\pm$ 0.29                | 1.90 $\pm$ 0.24             | 1.70 $\pm$ 0.25             | 1.810 $\pm$ 0.29          | 1.63 $\pm$ 0.13                |
| $H_i$   |                                                     |                     | 2.12 $\pm$ 0.30           | 2.04 $\pm$ 0.32                | 2.09 $\pm$ 0.29             | 1.90 $\pm$ 0.28             | 1.94 $\pm$ 0.22           | 1.95 $\pm$ 0.22                |
| $H_e$   | 0.89                                                | 0.61                |                           | 0.18 $\pm$ 0.03                |                             | 0.34 $\pm$ 0.01             |                           | 0.50 $\pm$ 0.07                |
| $H_b$   | 0.88                                                | 0.63                | 0.78 $\pm$ 0.10           | 0.514 $\pm$ 0.11               | 0.71 $\pm$ 0.01             | 0.51 $\pm$ 0.14             | 0.67 $\pm$ 0.04           | 0.57 $\pm$ 0.05                |
| $H_a$   |                                                     |                     | 1.25 $\pm$ 0.14           | 1.20 $\pm$ 0.23                | 1.26 $\pm$ 0.07             | 1.11 $\pm$ 0.08             | 1.16 $\pm$ 0.08           | 0.68 $\pm$ 0.18                |
